# Supplementary material for: RSK2 drives cell motility by serine phosphorylation of LARG and activation of Rho GTPases
Source: PubMed Central journal article supplement — Proc Natl Acad Sci U S A. 2017 Dec 26;115(2):E190–9. doi: 10.1073/pnas.1708584115 (PMC5777029; doi:10.1073/pnas.1708584115), 2017-12-26
Supplement: pnas.1708584115.sd01.pdf [file pnas.1708584115.sd01.pdf]

**Dataset S1. The role of RSK2-Y707A-RhoA signaling on U87MG cell migration and invasion *p* values**

**a) Fig. 3A, B: Effects of DN-Rho GTPases on active RSK2-Y707A-induced U87MG cell migration and invasion**

| Treatments               |                 | Fold Induction<br>(Mean ± SD) | <i>p</i> value (versus) |                         |                         |
|--------------------------|-----------------|-------------------------------|-------------------------|-------------------------|-------------------------|
|                          |                 |                               | Flag-EV+HA-EV           | RSK2+HA-EV              | Flag-EV+Rho-T19N        |
| <b>Migration (n = 4)</b> |                 |                               |                         |                         |                         |
| HA-EV                    | Flag-EV         | 1                             |                         |                         |                         |
|                          | Flag-RSK2-Y707A | 1.95 ± 0.18                   | 3.71 × 10 <sup>-5</sup> |                         |                         |
| HA-RhoA-T19N             | Flag-EV         | 1.61 ± 0.19                   | 7.05 × 10 <sup>-4</sup> |                         |                         |
|                          | Flag-RSK2-Y707A | 1.16 ± 0.33                   | 0.366                   | 5.62 × 10 <sup>-3</sup> | 5.86 × 10 <sup>-2</sup> |
| HA-RhoB-T19N             | Flag-EV         | 1.62 ± 0.21                   | 1.20 × 10 <sup>-3</sup> |                         |                         |
|                          | Flag-RSK2-Y707A | 1.11 ± 0.09                   | 5.67 × 10 <sup>-2</sup> | 1.50 × 10 <sup>-4</sup> | 4.94 × 10 <sup>-3</sup> |
| HA-RhoC-T19N             | Flag-EV         | 2.73 ± 0.22                   | 4.56 × 10 <sup>-6</sup> |                         |                         |
|                          | Flag-RSK2-Y707A | 1.43 ± 0.23                   | 1.04 × 10 <sup>-2</sup> | 1.12 × 10 <sup>-2</sup> | 1.90 × 10 <sup>-4</sup> |
| <b>Invasion (n = 3)</b>  |                 |                               |                         |                         |                         |
| HA-EV                    | Flag-EV         | 1                             |                         |                         |                         |
|                          | Flag-RSK2-Y707A | 2.37 ± 0.34                   | 2.13 × 10 <sup>-3</sup> |                         |                         |
| HA-RhoA-T19N             | Flag-EV         | 1.75 ± 0.36                   | 2.24 × 10 <sup>-2</sup> |                         |                         |
|                          | Flag-RSK2-Y707A | 1.02 ± 0.21                   | 0.866                   | 4.21 × 10 <sup>-3</sup> | 3.90 × 10 <sup>-2</sup> |
| HA-RhoB-T19N             | Flag-EV         | 1.72 ± 0.14                   | 9.41 × 10 <sup>-4</sup> |                         |                         |
|                          | Flag-RSK2-Y707A | 1.15 ± 0.07                   | 1.61 × 10 <sup>-2</sup> | 3.56 × 10 <sup>-3</sup> | 3.32 × 10 <sup>-3</sup> |
| HA-RhoC-T19N             | Flag-EV         | 3.66 ± 0.62                   | 1.79 × 10 <sup>-3</sup> |                         |                         |
|                          | Flag-RSK2-Y707A | 1.21 ± 0.23                   | 0.181                   | 8.02 × 10 <sup>-3</sup> | 3.11 × 10 <sup>-3</sup> |

**b) Fig 3C, D: Effects of Rho GTPase silencing on active RSK2-Y707A-induced U87MG cell migration and invasion**

| Treatments                       |                 | Folds Induction<br>(Mean ± SD) | <i>p</i> value ( <i>versus</i> ) |                         |                         |
|----------------------------------|-----------------|--------------------------------|----------------------------------|-------------------------|-------------------------|
|                                  |                 |                                | Flag-EV+shLacZ                   | RSK2+shLacZ             | Flag-EV+shRho           |
| <b>Migration</b> ( <i>n</i> = 3) |                 |                                |                                  |                         |                         |
| shLacZ                           | Flag-EV         | 1                              |                                  |                         |                         |
|                                  | Flag-RSK2-Y707A | 1.94 ± 0.33                    | 7.55 × 10 <sup>-3</sup>          |                         |                         |
| shRhoA                           | Flag-EV         | 1.36 ± 0.22                    | 4.38 × 10 <sup>-3</sup>          |                         |                         |
|                                  | Flag-RSK2-Y707A | 1.05 ± 0.08                    | 0.285                            | 1.02 × 10 <sup>-2</sup> | 8.03 × 10 <sup>-2</sup> |
| shRhoB                           | Flag-EV         | 1.53 ± 0.30                    | 3.68 × 10 <sup>-2</sup>          |                         |                         |
|                                  | Flag-RSK2-Y707A | 1.31 ± 0.20                    | 5.09 × 10 <sup>-2</sup>          | 4.95 × 10 <sup>-2</sup> | 0.353                   |
| shRhoC                           | Flag-EV         | 2.86 ± 0.57                    | 4.91 × 10 <sup>-3</sup>          |                         |                         |
|                                  | Flag-RSK2-Y707A | 2.09 ± 0.07                    | 1.25 × 10 <sup>-5</sup>          | 0.485                   | 8.22 × 10 <sup>-2</sup> |
| <b>Invasion</b> ( <i>n</i> = 3)  |                 |                                |                                  |                         |                         |
| shLacZ                           | Flag-EV         | 1                              |                                  |                         |                         |
|                                  | Flag-RSK2-Y707A | 2.60 ± 0.57                    | 8.32 × 10 <sup>-3</sup>          |                         |                         |
| shRhoA                           | Flag-EV         | 1.74 ± 0.34                    | 1.92 × 10 <sup>-2</sup>          |                         |                         |
|                                  | Flag-RSK2-Y707A | 1.35 ± 0.31                    | 0.121                            | 2.88 × 10 <sup>-2</sup> | 0.212                   |
| shRhoB                           | Flag-EV         | 1.69 ± 0.24                    | 7.60 × 10 <sup>-3</sup>          |                         |                         |
|                                  | Flag-RSK2-Y707A | 1.01 ± 0.15                    | 0.876                            | 9.70 × 10 <sup>-3</sup> | 1.49 × 10 <sup>-2</sup> |
| shRhoC                           | Flag-EV         | 4.76 ± 1.06                    | 3.59 × 10 <sup>-3</sup>          |                         |                         |
|                                  | Flag-RSK2-Y707A | 1.78 ± 0.15                    | 8.53 × 10 <sup>-4</sup>          | 7.46 × 10 <sup>-2</sup> | 8.64 × 10 <sup>-3</sup> |

c) Fig 6C: Effects of LARG-DN ( $\Delta$ DH/PH) and LARG-S1288A on active RSK2-induced U87MG cell migration and invasion

| Treatments               |                 | Folds Induction<br>(Mean $\pm$ SD) | <i>p</i> value ( <i>versus</i> ) |                  |
|--------------------------|-----------------|------------------------------------|----------------------------------|------------------|
|                          |                 |                                    | Flag-EV+Myc-EV                   | Flag-RSK2+Myc-EV |
| <b>Migration (n = 3)</b> |                 |                                    |                                  |                  |
| Myc-EV                   | Flag-EV         | 1                                  |                                  |                  |
|                          | Flag-RSK2-T577E | 3.28 $\pm$ 0.85                    | 7.24 $\times$ 10 <sup>-3</sup>   |                  |
| Myc-LARG-DN              | Flag-EV         | 1.21 $\pm$ 0.24                    | 0.2114                           |                  |
|                          | Flag-RSK2-T577E | 1.72 $\pm$ 0.52                    | 0.0748                           | 0.0377           |
| Myc-LARG-S1288A          | Flag-EV         | 1.57 $\pm$ 0.23                    | 0.0118                           |                  |
|                          | Flag-RSK2-T577E | 2.12 $\pm$ 0.69                    | 0.0489                           | 0.0983           |
| <b>Invasion (n = 3)</b>  |                 |                                    |                                  |                  |
| Myc-EV                   | Flag-EV         | 1                                  |                                  |                  |
|                          | Flag-RSK2-T577E | 3.43 $\pm$ 0.54                    | 1.44 $\times$ 10 <sup>-3</sup>   |                  |
| Myc-LARG-DN              | Flag-EV         | 1.11 $\pm$ 0.06                    | 0.0257                           |                  |
|                          | Flag-RSK2-T577E | 2.04 $\pm$ 0.28                    | 3.10 $\times$ 10 <sup>-3</sup>   | 0.0164           |
| Myc-LARG-S1288A          | Flag-EV         | 1.51 $\pm$ 0.06                    | 8.71 $\times$ 10 <sup>-5</sup>   |                  |
|                          | Flag-RSK2-T577E | 2.34 $\pm$ 0.42                    | 5.18 $\times$ 10 <sup>-3</sup>   | 0.0499           |

d) Fig 7C: Effects of deletion of LARG (ARHGEF12) on active RSK2-induced U87MG cell migration and invasion

| Treatments               |                 | Fold Induction<br>(Mean ± SD) | <i>p</i> value (versus) |                               |                         |
|--------------------------|-----------------|-------------------------------|-------------------------|-------------------------------|-------------------------|
|                          |                 |                               | CRISPR-Con+Flag-<br>EV  | CRISPR-Con+RSK2               | CRISPR-LARG+Flag-<br>EV |
| <b>Migration (n = 2)</b> |                 |                               |                         |                               |                         |
| CRISPR-Con               | Flag-EV         | 1                             |                         |                               |                         |
|                          | Flag-RSK2-T577E | 1.59 ± 0.074                  | 1.57 × 10 <sup>-6</sup> |                               |                         |
|                          | Flag-RSK2-Y707A | 1.71 ± 0.066                  | 1.67 × 10 <sup>-7</sup> |                               |                         |
| CRISPR-LARG              | Flag-EV         | 1.25 ± 0.044                  | 2.95 × 10 <sup>-6</sup> |                               |                         |
|                          | Flag-RSK2-T577E | 1.13 ± 0.12                   | 0.0503                  | <b>2.99 × 10<sup>-5</sup></b> | 0.0582                  |
|                          | Flag-RSK2-Y707A | 1.09 ± 0.033                  | 3.86 × 10 <sup>-4</sup> | <b>9.50 × 10<sup>-8</sup></b> | 6.00 × 10 <sup>-5</sup> |
| <b>Invasion (n = 2)</b>  |                 |                               |                         |                               |                         |
| CRISPR-Con               | Flag-EV         | 1                             |                         |                               |                         |
|                          | Flag-RSK2-T577E | 1.78 ± 0.29                   | 0.042                   |                               |                         |
|                          | Flag-RSK2-Y707A | 1.54 ± 0.096                  | 3.89 × 10 <sup>-3</sup> |                               |                         |
| CRISPR-LARG              | Flag-EV         | 0.86 ± 0.078                  | 0.0756                  |                               |                         |
|                          | Flag-RSK2-T577E | 1.36 ± 0.12                   | 0.1737                  | <b>0.0479</b>                 | 0.0352                  |
|                          | Flag-RSK2-Y707A | 0.82 ± 0.095                  | 0.0661                  | <b>7.76 × 10<sup>-4</sup></b> | 0.5981                  |

e) Fig S3F, G: The effects of WT-RSK2 and their mutants on U87MG cell migration and invasion

| Treatments      | Migration ( <i>n</i> = 3)  |                             | Invasion ( <i>n</i> = 3)    |                             |
|-----------------|----------------------------|-----------------------------|-----------------------------|-----------------------------|
|                 | Fold Induction (Mean ± SD) | <i>p</i> value (vs Flag-EV) | Folds Induction (Mean ± SD) | <i>p</i> value (vs Flag-EV) |
| Flag-EV         | 1                          |                             | 1                           |                             |
| Flag-RSK2-WT    | 1.34 ± 0.24                | 0.07012                     | 1.21 ± 0.14                 | 0.05384                     |
| Flag-RSK2-Y707A | 1.75 ± 0.20                | 0.00291                     | 2.00 ± 0.32                 | 0.00583                     |
| Flag-RSK2-NTKD  | 1.67 ± 0.16                | 0.00188                     | 1.39 ± 0.15                 | 0.01203                     |
| Flag-RSK2-CTKD  | 1.11 ± 0.35                | 0.62159                     | 1.37 ± 0.25                 | 0.06478                     |
| Flag-RSK2-S227E | 1.22 ± 0.22                | 0.15841                     | 1.88 ± 0.45                 | 0.02791                     |
| Flag-RSK2-S386E | 1.25 ± 0.38                | 0.31266                     | 1.42 ± 0.17                 | 0.01298                     |
| Flag-RSK2-T577E | 2.77 ± 0.33                | 0.00074                     | 3.41 ± 0.57                 | 0.00182                     |

f) Fig S4. A, B: The role Rho GTPases on RSK2-T577E-mediated U87MG cell migration and invasion

| Treatments               |                 | Fold Induction<br>(Mean ± SD) | <i>p</i> value (versus) |                         |                  |
|--------------------------|-----------------|-------------------------------|-------------------------|-------------------------|------------------|
|                          |                 |                               | Flag-EV+HA-EV           | RSK2+HA-EV              | Flag-EV+Rho-T19N |
| <b>Migration (n = 3)</b> |                 |                               |                         |                         |                  |
| HA-EV                    | Flag-EV         | 1                             |                         |                         |                  |
|                          | Flag-RSK2-T577E | 3.07 ± 0.37                   | 6.39 × 10 <sup>-4</sup> |                         |                  |
| HA-RhoA-T19N             | Flag-EV         | 1.44 ± 0.10                   | 1.58 × 10 <sup>-3</sup> |                         |                  |
|                          | Flag-RSK2-T577E | 1.36 ± 0.29                   | 9.51 × 10 <sup>-2</sup> | 3.31 × 10 <sup>-3</sup> | 0.676            |
| HA-RhoB-T19N             | Flag-EV         | 1.61 ± 0.07                   | 9.14 × 10 <sup>-5</sup> |                         |                  |
|                          | Flag-RSK2-T577E | 1.75 ± 0.40                   | 3.16 × 10 <sup>-2</sup> | 1.40 × 10 <sup>-2</sup> | 0.582            |
| HA-RhoC-T19N             | Flag-EV         | 2.79 ± 0.14                   | 2.36 × 10 <sup>-5</sup> |                         |                  |
|                          | Flag-RSK2-T577E | 2.68 ± 0.31                   | 7.06 × 10 <sup>-4</sup> | 0.240                   | 0.618            |
| <b>Invasion (n = 3)</b>  |                 |                               |                         |                         |                  |
| HA-EV                    | Flag-EV         | 1                             |                         |                         |                  |
|                          | Flag-RSK2-T577E | 3.21 ± 0.22                   | 5.89 × 10 <sup>-5</sup> |                         |                  |
| HA-RhoA-T19N             | Flag-EV         | 1.51 ± 0.17                   | 7.29 × 10 <sup>-3</sup> |                         |                  |
|                          | Flag-RSK2-T577E | 1.61 ± 0.66                   | 0.186                   | 1.62 × 10 <sup>-2</sup> | 0.813            |
| HA-RhoB-T19N             | Flag-EV         | 1.51 ± 0.19                   | 9.14 × 10 <sup>-3</sup> |                         |                  |
|                          | Flag-RSK2-T577E | 1.50 ± 0.48                   | 0.143                   | 4.74 × 10 <sup>-3</sup> | 0.970            |
| HA-RhoC-T19N             | Flag-EV         | 2.86 ± 0.16                   | 4.03 × 10 <sup>-5</sup> |                         |                  |
|                          | Flag-RSK2-T577E | 3.06 ± 0.13                   | 1.15 × 10 <sup>-5</sup> | 0.372                   | 0.164            |

**Note:** The *p* value was calculated using student's *t*-test. EV, empty vector; DN, dominant negative; shRhoA, small hairpin RNA against human RhoA; shRhoB, small hairpin RNA against human RhoB; shRhoC, small hairpin RNA against human RhoC; shLacZ, small hairpin RNA against β-galactosidase. *N* values are biological replicates.
